# Supplementary material
Source: PubMed Central journal article supplement (PMC8324263)

On-line Table 1.

Summary of patient demographics, tumor location, tumor volume, intraoperative tumor consistency score, histological subtype, and cohort.

| <b>Age</b> | <b>Sex</b> | <b>Tumor location</b>        | <b>Tumor volume (mm<sup>3</sup>)</b> | <b>Intraoperative tumor consistency score</b> | <b>Histological subtype</b> | <b>Cohort</b>       |
|------------|------------|------------------------------|--------------------------------------|-----------------------------------------------|-----------------------------|---------------------|
| 74         | F          | tuberculum sellae            | 2447                                 | 2                                             | meningothelial              | Cohort-1 / Cohort-2 |
| 72         | F          | convexity                    | 28318                                | 3                                             | fibrous                     | Cohort-1 / Cohort-2 |
| 75         | F          | sphenoid ridge               | 12530                                | 2                                             | meningothelial              | Cohort-1 / Cohort-2 |
| 41         | M          | sphenoid ridge<br>cerebellar | 39614                                | 4.5                                           | transitional                | Cohort-1 / Cohort-2 |
| 69         | F          | convexity                    | 13627                                | 2.5                                           | fibrous                     | Cohort-1 / Cohort-2 |
| 62         | M          | convexity                    | 10779                                | 4                                             | fibrous                     | Cohort-1 / Cohort-2 |
| 70         | M          | convexity                    | 6697                                 | 3                                             | meningothelial              | Cohort-1 / Cohort-2 |
| 75         | F          | olfactory groove             | 14070                                | 4                                             | transitional                | Cohort-1 / Cohort-2 |
| 42         | F          | olfactory groove             | 13795                                | 8                                             | transitional                | Cohort-1 / Cohort-2 |
| 30         | F          | tuberculum sellae            | 1339                                 | 3                                             | meningothelial              | Cohort-1 / Cohort-2 |
| 78         | F          | falx                         | 32305                                | 3                                             | fibrous                     | Cohort-1 / Cohort-2 |
| 49         | F          | petroclival                  | 6697                                 | 4                                             | meningothelial              | Cohort-1 / Cohort-2 |
| 65         | M          | convexity<br>medial cranial  | 43168                                | 3                                             | transitional                | Cohort-1 / Cohort-2 |
| 72         | F          | fossa                        | 3945                                 | 3                                             | meningothelial              | Cohort-1 / Cohort-2 |
| 63         | F          | petroclival                  | 7204                                 | 2                                             | meningothelial              | Cohort-2            |
| 68         | F          | tuberculum sellae            | 3238                                 | 1                                             | angiomatous                 | Cohort-2            |
| 42         | F          | foramen magnum               | 5843                                 | 4                                             | meningothelial              | Cohort-2            |
| 84         | F          | convexity                    | 75009                                | 5.5                                           | meningothelial              | Cohort-2            |

On-line Figure 1.

Contrast-enhanced CT images, color-coded stiffness maps, and perfusion maps of three representative cases. Each contrast-enhanced CT, stiffness map, and perfusion map in the same row is displayed at the same window level and window width.

Left column: left convexity meningioma (fibrous meningioma) in a 72-year-old woman (intraoperative tumor consistency score = 3; stiffness = 2.65 kPa; rBF = 4.27; rBV = 5.66; rMTT = 1.26).

Middle column: left convexity meningioma (fibrous meningioma) in a 62-year-old man (intraoperative tumor consistency score = 4; stiffness = 2.92 kPa; rBF = 1.65; rBV = 1.91; rMTT = 1.16).

Right column: right olfactory groove meningioma (transitional meningioma) in a 42-year-old woman (intraoperative tumor consistency score = 8; stiffness = 5.34 kPa; rBF = 2.39; rBV = 2.03; rMTT = 0.87).

HU, Hounsfield Unit; AU, arbitrary units.

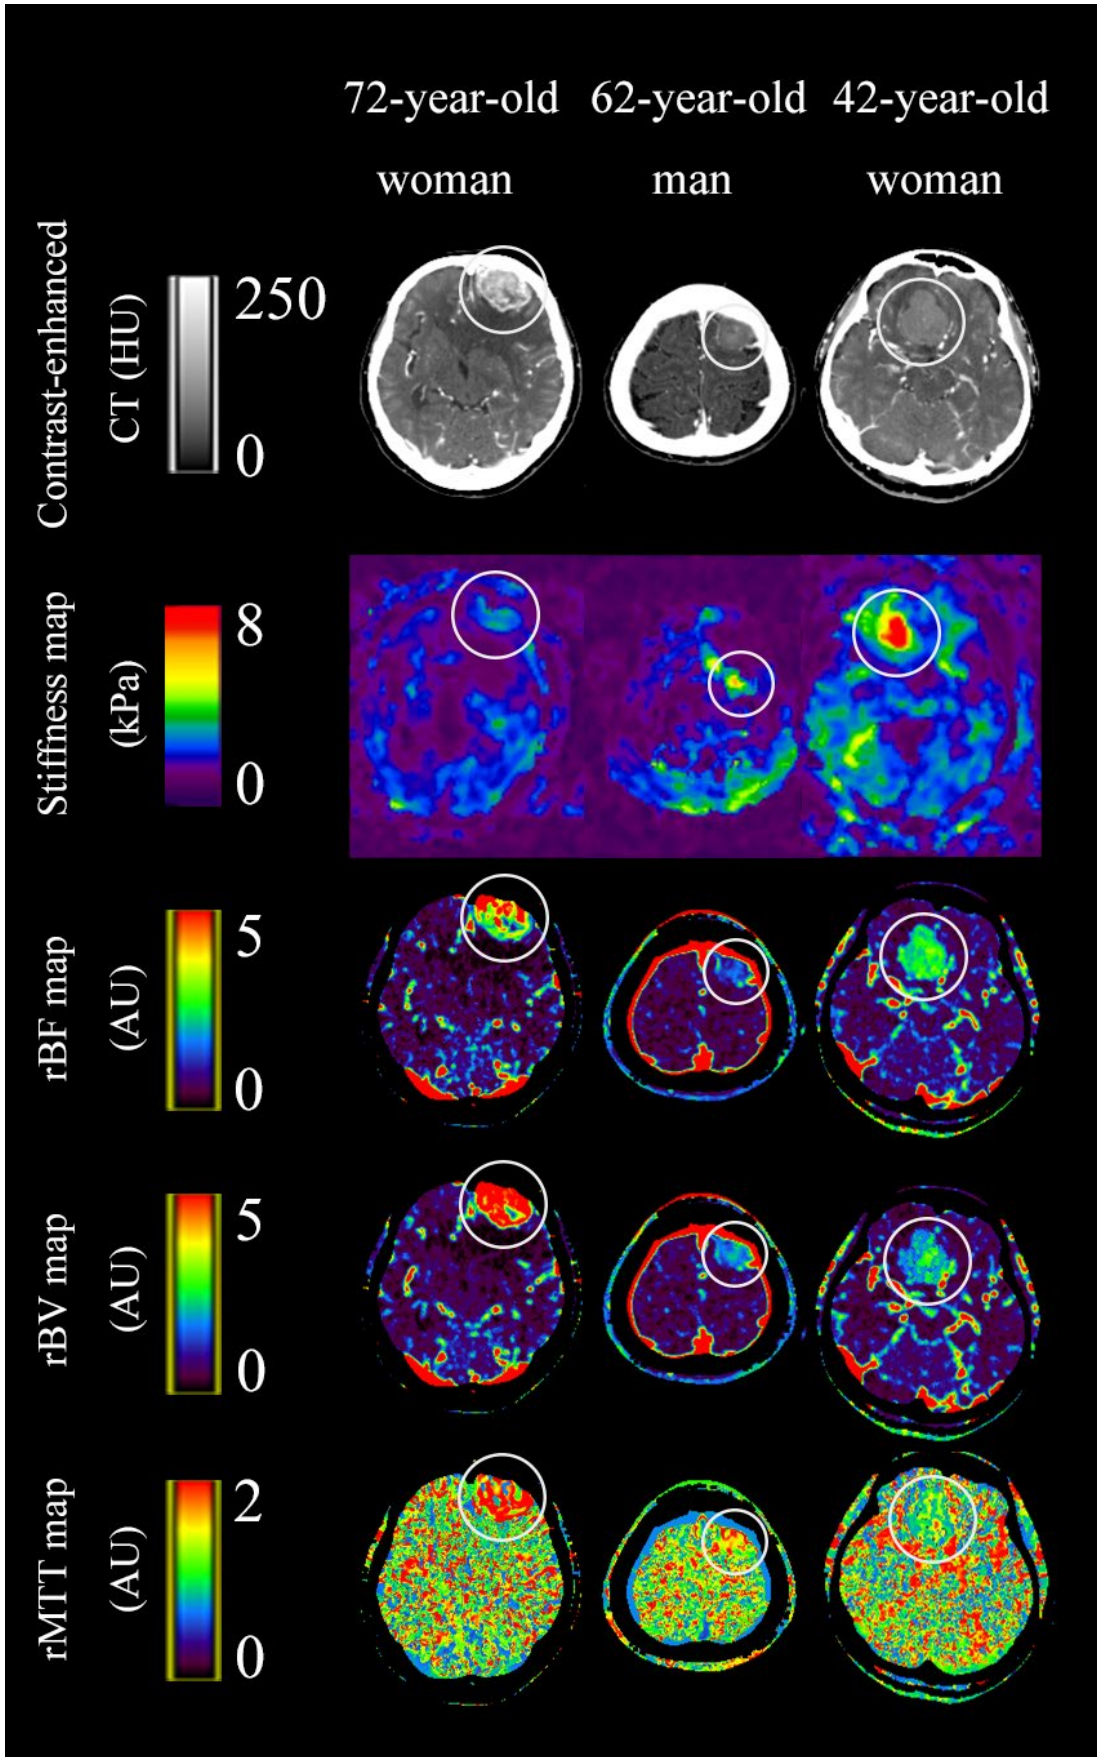

Supplement: 0877.pdf [file 0877.pdf]
